# Supplementary material for: Novel method for evaluating the health condition of mice in space through a video downlink
Source: PubMed Central journal article supplement — Exp Anim. 2021 Jan 22;70(2):236–44. doi: 10.1538/expanim.20-0102 (PMC8150242; doi:10.1538/expanim.20-0102), 2021-01-22
Supplement: expanim-70-236-s005.pdf [file expanim-70-236-s005.pdf]

Supplementary Table 1. Criteria for observational check items

| Check item        | Criteria                                                                                                                                                      |
|-------------------|---------------------------------------------------------------------------------------------------------------------------------------------------------------|
| <base item>       |                                                                                                                                                               |
| Fur condition     | Dull fur, Dermatitis, Alopecia,<br>Wetted fur (over half of the face or one-third of the back)<br>Prominent dorsal pelvic or segmentation of vertebral column |
| Respiratory       | Dyspnea, Shallow rapid breathing, Gasping, Abdominal effort                                                                                                   |
| <additional item> |                                                                                                                                                               |
| Ears              | Dermatitis                                                                                                                                                    |
| Mouth             | Malocclusion                                                                                                                                                  |
| Eye               | Unusual mucous membrane (Ex. Pale, Bluish), Sunken, Recessed, Discharge, White scar                                                                           |
| Nose              | Discharge                                                                                                                                                     |
| Tail              | Dermatitis, Alopecia, Kinking, Redness                                                                                                                        |
| Limbs             | Paralyzed (Trouble gripping the bar), Redness                                                                                                                 |
